# Supplementary material
Source: PubMed Central journal article supplement (PMC5039338)
Supplement: thnov06p1988s1.pdf [file thnov06p1988s1.pdf]

**Specific inhibition of DNMT3A/ISGF3 $\gamma$  interaction increases temozolomide efficiency by reducing tumour growth.**

Cheray Mathilde<sup>1-2-3</sup>, Pacaud Romain<sup>1-2</sup>, Nadaradjane Arulraj<sup>1-2</sup>, Oliver Lisa<sup>1-2-4</sup>, Vallette François M<sup>1-2-5</sup> and Cartron Pierre-François<sup>1-2-5-6\*</sup>

<sup>1</sup>Centre de Recherche en Cancérologie Nantes-Angers, INSERM, U892, “Equipe Apoptose et progression tumorale”, Equipe membre du LaBEX IGO. 8 quai moncoussu, BP7021, 44007 Nantes, France.

<sup>2</sup>Université de Nantes, Faculté de Médecine, Département de Recherche en Cancérologie, IFR26, F-4400, Nantes, France.

<sup>3</sup>present address: Department of Oncology Pathology, Cancer Centrum Karolinska, Karolinska Institutet, Stockholm 17176, Sweden.

<sup>4</sup>CHU de Nantes, 1 Place Alexis Ricordeau, 44093 Nantes, France

<sup>5</sup>LaBCT, Institut de Cancérologie de l'Ouest, Boulevard J Monod, 44805 Nantes, Saint Herblain Cedex, France.

<sup>6</sup>Member of the “Réseau Epigénétique du Canceropôle Grand-Ouest”.

**\*correspondence:** [pierre-francois.cartron@univ-nantes.fr](mailto:pierre-francois.cartron@univ-nantes.fr), CRCNA, INSERM U892/CNRS U6299 “Equipe Apoptose et Progression tumorale”, LaBCT ICO Site René Gauducheau, Boulevard du Pr J Monod, Saint Herblain, 44805, France, phone: 33-25-348-4785

Incubated protein: GST  
Membrane: DNMT3A  
Detection: anti-GST

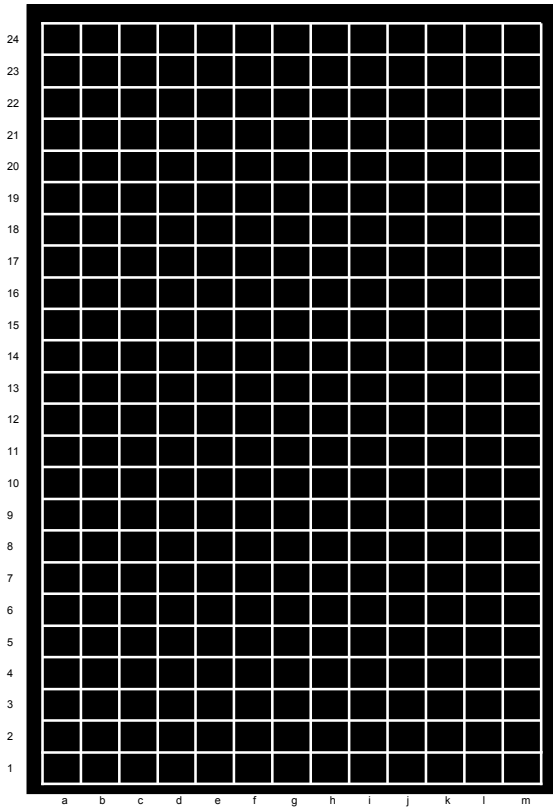

Incubated protein: -  
Membrane: DNMT3A  
Detection: anti-ISGF3

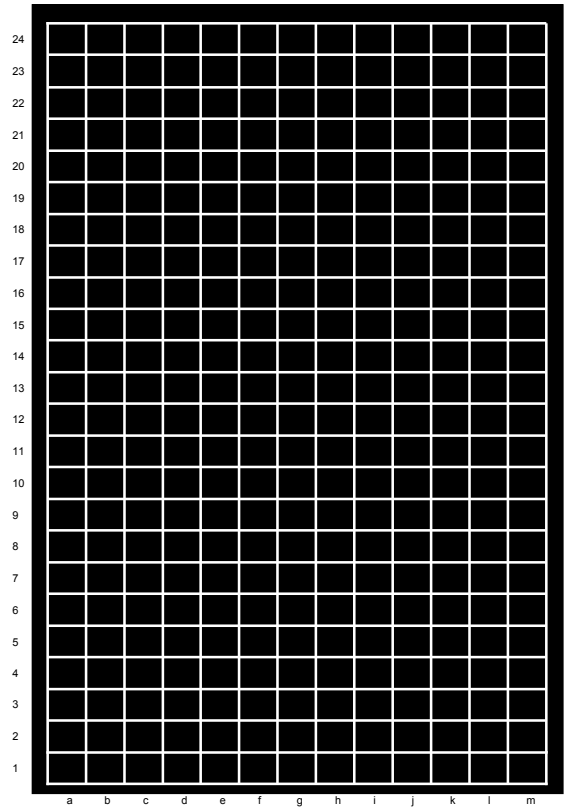

Incubated protein: GST-ISGF3  
Membrane: DNMT3A  
Detection: anti-ISGF3

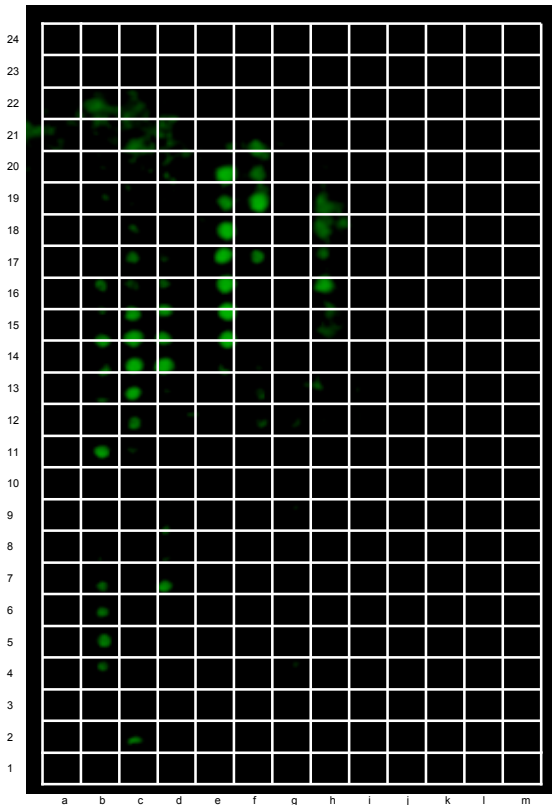

Figure S1. Illustration of the epitope mapping data obtained after incubation of 2  $\mu$ g of GST-ISGF3 $\gamma$  on the DNMT3A-membrane. Fluorescence was obtained using a Typhoon imaging system. Pictures are representatives of three independent experiments

**Supplemental table 1: Antibodies used in our study .**

| <b>Antibodies</b> | <b>Reference</b>                 |
|-------------------|----------------------------------|
| DNMT3A            | Active Motif#39206 & Abcam#13888 |
| ISGF3 $\gamma$    | Santa Cruz#sc10793               |
| AP2 $\alpha$      | Santa Cruz#sc55485               |
| GATA1             | Santa Cruz#sc13053x              |
| HDAC1             | Active Motif#39531               |

**Supplemental table 2: Primers used in our study .**

|              |                                            |
|--------------|--------------------------------------------|
| Primers      |                                            |
| MGMT (MeDIP) | TCTAGACCCCGCCCCA & GCGACCCAGACACTCACCAAG T |
